# Supplementary material
Source: Frontiers journal article supplement (https://www.frontiersin.org/articles/262153)
Supplement: Presentation_1.pdf [file Presentation_1.pdf]

## Supplementary Information

### Detection and Physicochemical Characterization of Membrane Vesicles (MVs) of *Lactobacillus reuteri* DSM 17938.

Rossella Grande<sup>1,2,§\*</sup>, Christian Celia<sup>1,3,§</sup>, Gabriella Mincione<sup>4</sup>, Annarita Stringaro<sup>5</sup>, Luisa Di Marzio<sup>1</sup>, Marisa Colone<sup>5</sup>, Maria Carmela Di Marcantonio<sup>4</sup>, Luca Savino<sup>4</sup>, Valentina Puca<sup>2,6</sup>, Roberto Santoliquido<sup>7,8</sup>, Marcello Locatelli<sup>1</sup>, Raffaella Muraro<sup>4</sup>, Luanne Hall-Stoodley<sup>9,10</sup>, Paul Stoodley<sup>10,11</sup>.

<sup>1</sup>Department of Pharmacy, University of Chieti – Pescara “G. d’Annunzio”, Chieti, Italy.

<sup>2</sup>Center for Aging Science and Translational Medicine (CeSI-MeT), Chieti, Italy.

<sup>3</sup>Department of Nanomedicine, Houston Methodist Research Institute, Houston, TX, 77030, USA.

<sup>4</sup>Department of Medical, Oral, and Biotechnological Sciences, University of Chieti – Pescara “G. d’Annunzio”, Chieti, Italy.

<sup>5</sup>National Center for Drug Research and Evaluation, Italian National Institute of Health, Rome, Italy.

<sup>6</sup>Department of Biotechnological and Applied Clinical Sciences, University of L’Aquila, L’Aquila, Italy.

<sup>7</sup>AlfatestLab, Cinisello Balsamo (MI), Italy.

<sup>8</sup>Malvern Instruments Ltd., Worcestershire, UK.

<sup>9</sup>NIHR Wellcome Trust Clinical Research Facility, C Level, West Wing, Mailpoint 218, University Hospital Southampton NHS Foundation Trust, Southampton, SO16 6YD, UK;

<sup>10</sup>Department of Microbial Infection and Immunity, Centre for Microbial Interface Biology, The Ohio State University, Columbus, Ohio, 43210 - 2210, USA.

<sup>11</sup>National Center for Advanced Tribology, Faculty of Engineering and the Environment, University of Southampton, Southampton, UK.

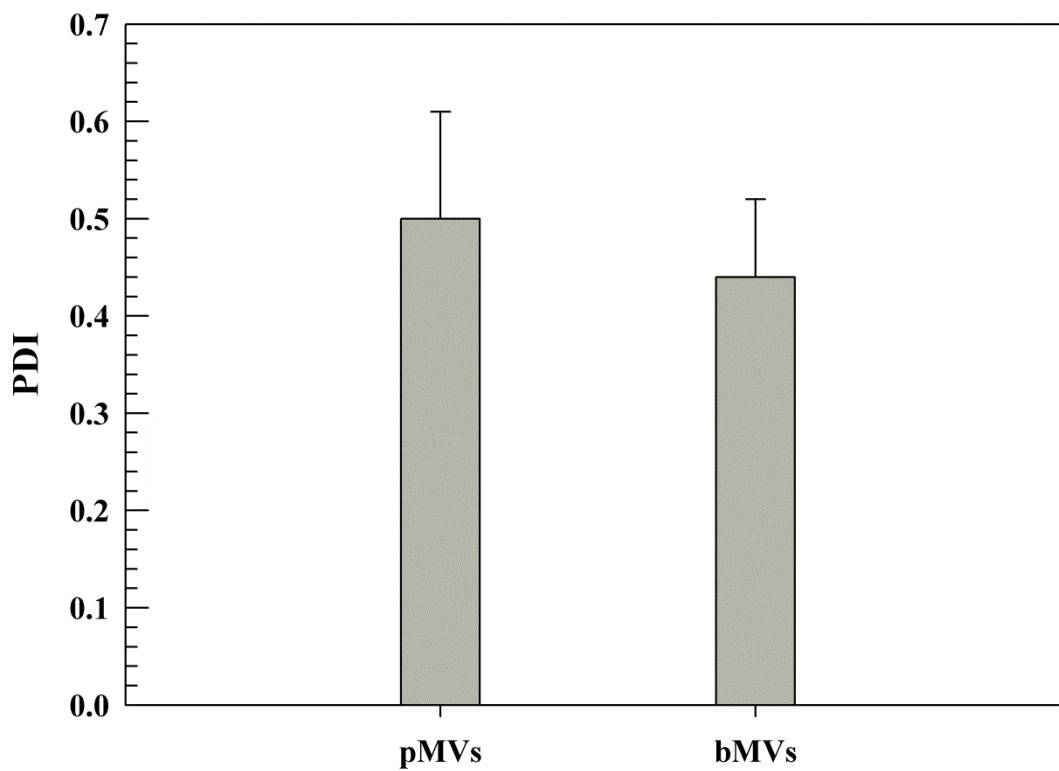

**Figure S1. PDI of the pMVs and bMVs of *Lactobacillus reuteri* DSM 17938.** The analysis was carried out at 25°C, and data are the average of ten measurements  $\pm$  standard deviation as triplicates. The error bar if not visible is within the symbol.

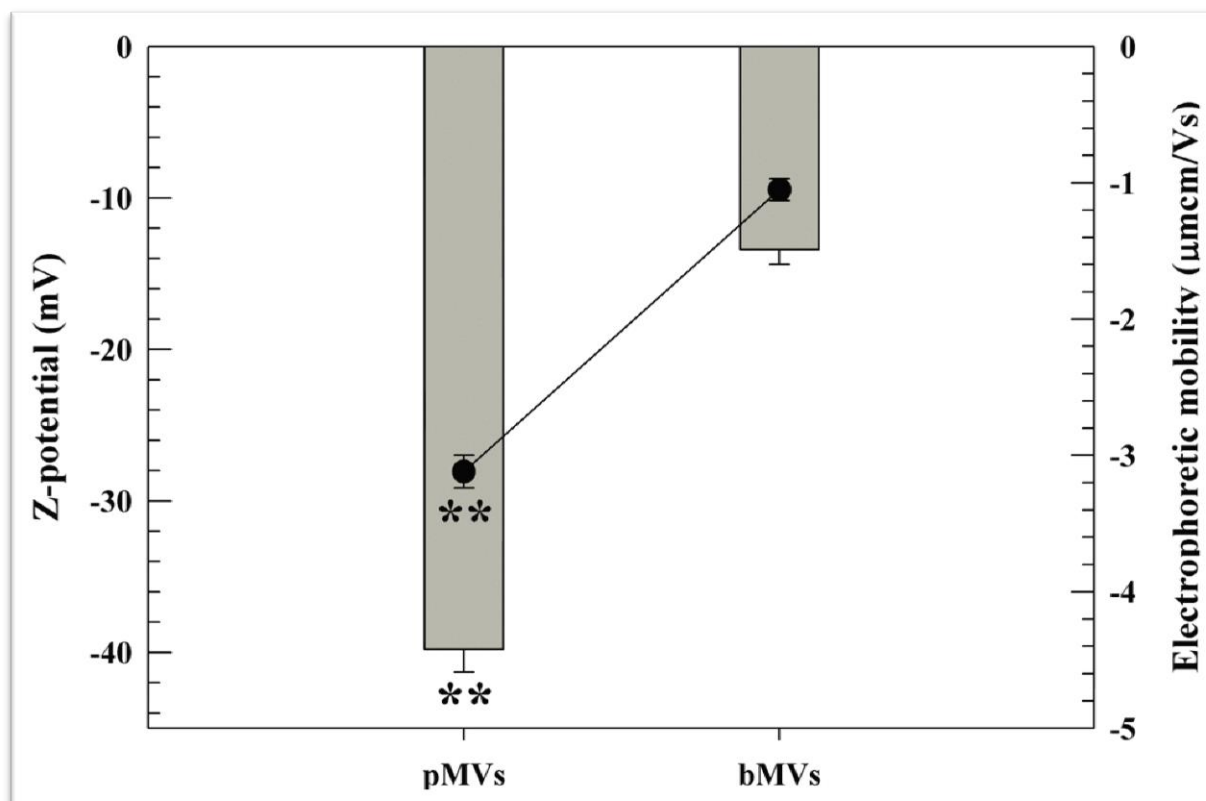

**Figure S2. Z – potential and electrophoretic mobility of the pMVs and bMVs of *Lactobacillus reuteri* DSM 17938.** The histograms represent the Z – potential values (mV); while the black full circles are the electrophoretic mobility [ $(\mu\text{m} \times \text{cm})/\text{Vs}$ ]. The analysis was carried out at 25°C, and data are the average of ten measurements  $\pm$  standard deviation as triplicates. The error bar if not visible is within the symbol. \*\* $p < 0.01$ .

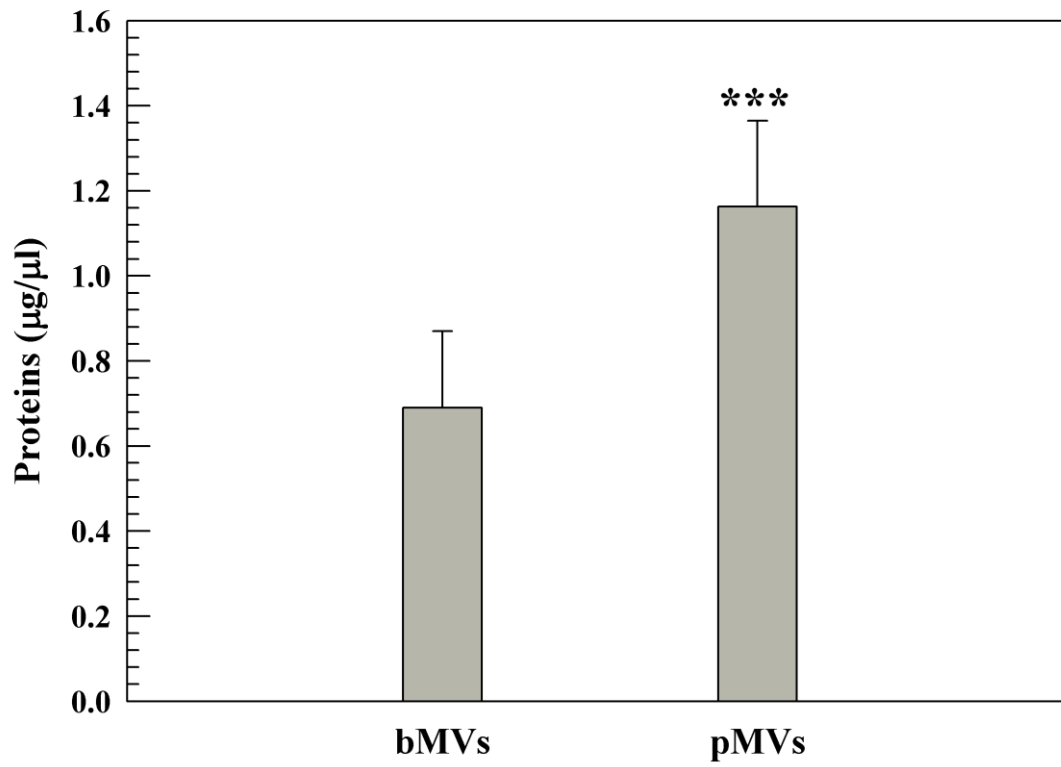

**Figure S3. Quantification of proteins associated to pMVs and bMVs.** The protein quantification was carried out using the BCA Protein Assay Kit. \*\*\* $p \leq 0.001$  compared to pMVs.

**Table S1.** Averaged tracking analysis of particles versus sizes (nm) for biofilm and planktonic phenotypes of *Lactobacillus reuteri* DSM 17938. D10, D50 and D90 show the average size of 10, 50 and 90% of particles distributed in different samples. The final concentration of bMVs and pMVs was  $4.04 \times 10^{10}$  (particles/ml), and  $2.22 \times 10^{10}$  (particles/ml), respectively. Samples were dispersed in phosphate buffer saline (PBS) before the analysis.

| <b>Samples</b>          | <b>D10 ± S.E.M.<sup>c</sup></b> | <b>D50 ± S.E.M.<sup>c</sup></b> | <b>D90 ± S.E.M.<sup>c</sup></b> |
|-------------------------|---------------------------------|---------------------------------|---------------------------------|
| <b>bMVs<sup>a</sup></b> | 62.5 ± 1.2                      | 107.4 ± 2.1                     | 200.6 ± 1.7                     |
| <b>pMVs<sup>b</sup></b> | 80.1 ± 2.2                      | 129.4 ± 1.1                     | 210.3 ± 1.6                     |

<sup>a</sup>biofilm-associated MVs; <sup>b</sup>planktonic – associated MVs; <sup>c</sup>standard error of the mean (SEM).

Supplementary movie 1: [https://figshare.com/articles/Supplementary\\_Movie\\_1\\_avi/4690132](https://figshare.com/articles/Supplementary_Movie_1_avi/4690132)

Supplementary movie 2: [https://figshare.com/articles/Supplementary\\_Movie\\_2/4690141](https://figshare.com/articles/Supplementary_Movie_2/4690141)
